# Supplementary material for: Synergistic effect of oridonin and a PI3K/mTOR inhibitor on the non-germinal center B cell-like subtype of diffuse large B cell lymphoma
Source: Springer Nature journal article supplement (doi:10.1186/s13045-016-0303-0), 2016-08-23
Supplement: MOESM2 [file 10609814]

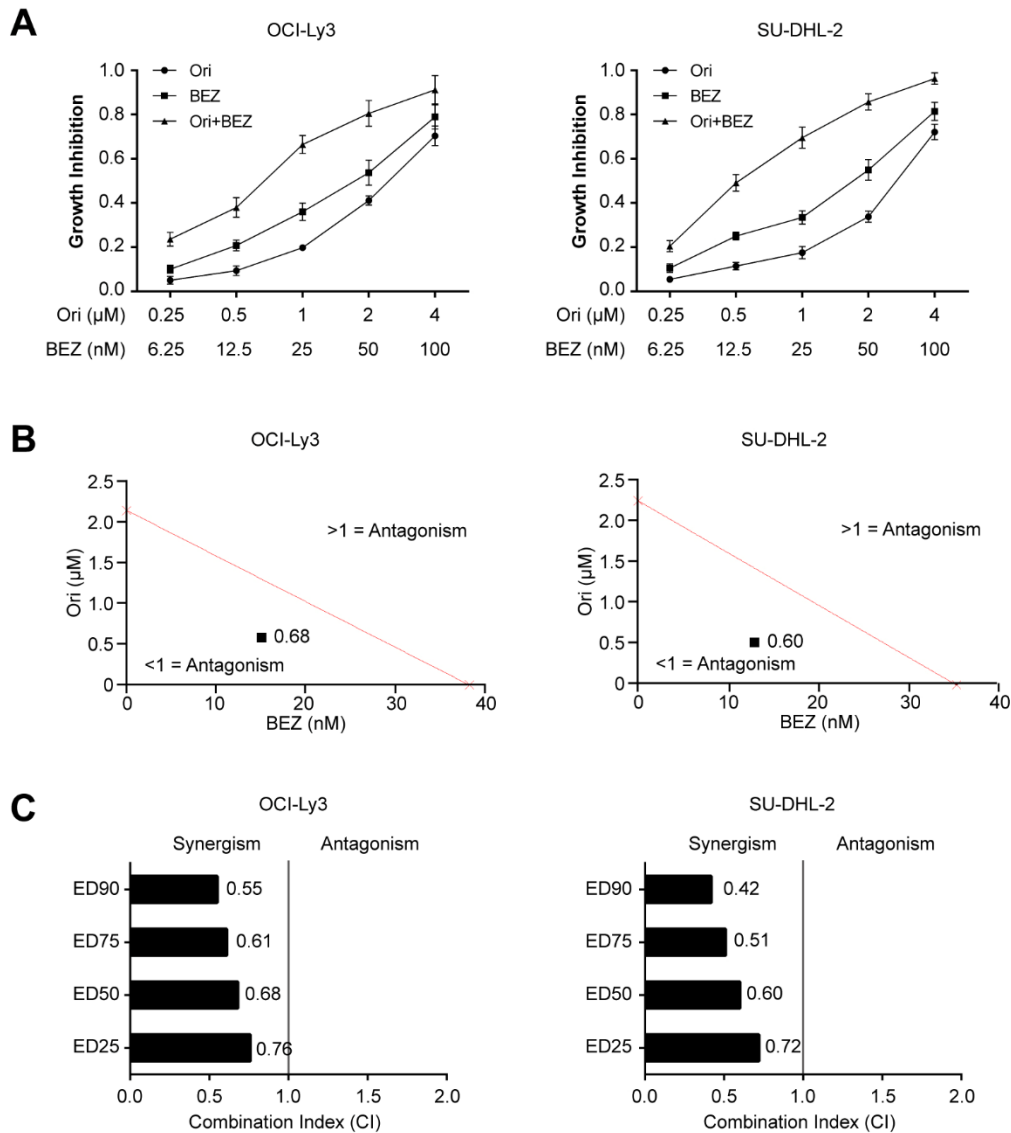

**Additional file 2: Combination effects of oridonin and NVP-BEZ235 on proliferation inhibition.**

(A) Cell viability of OCI-Ly3, SU-DHL-2 was measured by CCK-8 assay after treated with oridonin (2  $\mu$ M) and NVP-BEZ235 (25 nM) alone or in combination for 48h. Drugs were conducted simultaneously at the indicated concentrations. (B) Isobologram analysis of agent combination at ED50 and CI values were calculated as well. (C) CI values of all cell lines at ED25, ED50, ED75 and ED90. The lower CI values indicated the stronger synergism when  $CI < 1$ , and higher CI values means the stronger

antagonism when  $CI > 1$ . Additive effect was designated with  $CI = 1$ .
