# Supplementary material for: Synergistic effect of oridonin and a PI3K/mTOR inhibitor on the non-germinal center B cell-like subtype of diffuse large B cell lymphoma
Source: Springer Nature journal article supplement (doi:10.1186/s13045-016-0303-0), 2016-08-23
Supplement: MOESM3 [file 10609814]

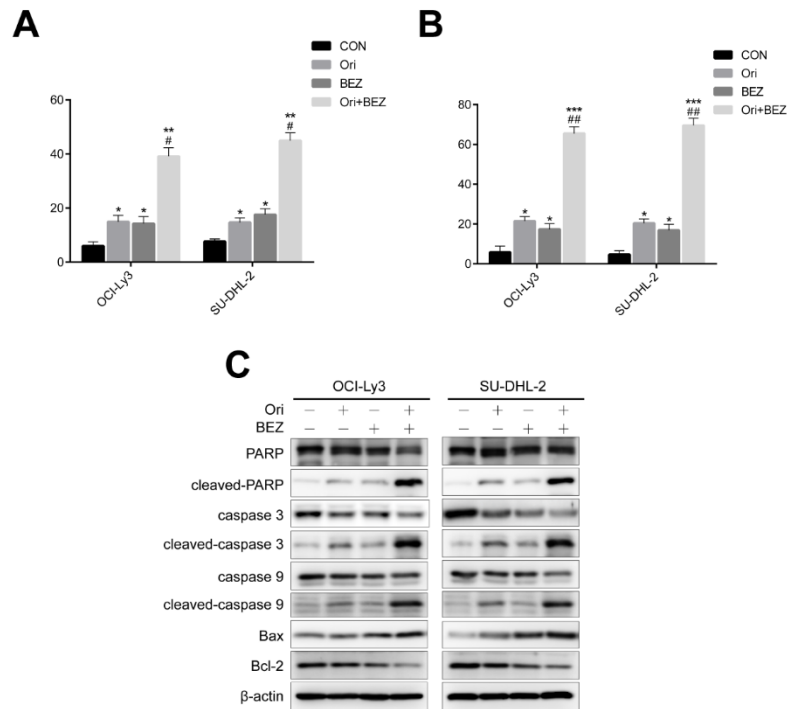

**Additional file 3: Oridonin combined with NVP-BEZ235 significantly increased the apoptosis on non-GCB DLBCL cell lines.**

(A, B) Cell lines were simultaneously treated with oridonin (2  $\mu$ M) and NVP-BEZ235 (25 nM) for 24h and 48 h, analyzing apoptosis by Annexin-V/PI staining with t test statistic assay. (Mean  $\pm$  S.D., n = 3, \* p < 0.05, \*\* p < 0.01, \*\*\* p < 0.001 compared with control group; # p < 0.05, ## p < 0.01 compared with single agent group. (C) Cell lines were subjected to indicated treatments and protein lysates were performed with immunoblotting, incubating with PARP, caspase3, caspase9, cleaved-PARP, cleaved-caspase3, cleaved-caspase9, Bax and Bcl-2 antibodies.
