# Supplementary material for: Synergistic effect of oridonin and a PI3K/mTOR inhibitor on the non-germinal center B cell-like subtype of diffuse large B cell lymphoma
Source: Springer Nature journal article supplement (doi:10.1186/s13045-016-0303-0), 2016-08-23
Supplement: MOESM5 [file 10609814]

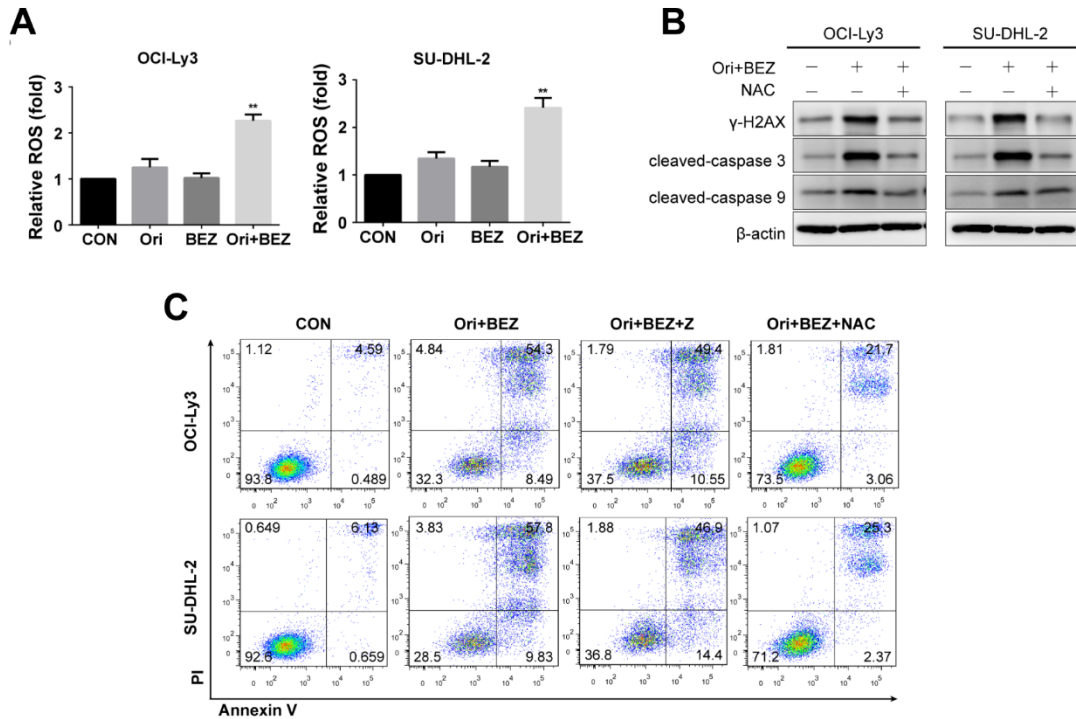

**Additional file 5: Cotreatment triggered ROS generation which mediated non-GCB DLBCL cell apoptosis.**

(A) Cell lines were simultaneously treated with oridonin (2  $\mu$ M) and NVP-BEZ235 (25 nM) for 48 h, FACS quantitative analysis of DCF-DA was used to detect ROS with t test statistic assay. (Mean  $\pm$  S.D., n = 3, \* p < 0.05, \*\* p < 0.01 compared with control group. (B) NAC pretreatment attenuated cotreatment-induced protein expression levels of  $\gamma$ H2AX, cleaved-caspase 3 and cleaved-caspase 9. (C) Pretreatment of cotreatment group cells with NAC (5 mM) and Z-DEVD-FMK (10  $\mu$ M) respectively for 48h, analyzing apoptosis by Annexin-V/PI staining.
